# Supplementary material for: Stability of the PHF10 subunit of PBAF signature module is regulated by phosphorylation: role of β-TrCP
Source: PubMed Central journal article supplement (PMC5514133; doi:10.1038/s41598-017-05944-3), 2017-07-17
Supplement: 41598_2017_5944_MOESM1_ESM.pdf [file 41598_2017_5944_MOESM1_ESM.pdf]

## SUPPLEMENT INFORMATION

### Stability of the PHF10 subunit of PBAF signature module is regulated by phosphorylation: role of $\beta$ -TrCP

Victor V. Tatarskiy Jr<sup>3\*</sup>, Yuriy P. Simonov<sup>2\*</sup>, Dmitriy S. Shcherbinin<sup>4</sup>, Alexander V. Brechalov<sup>2</sup>, Sofia G. Georgieva<sup>1,2†</sup>, Nataliya V. Soshnikova<sup>1†</sup>

#### Affiliation:

1- Department of Eukariotic Transcription Factors,  
Institute of Gene Biology, Russian Academy of Sciences,  
Vavilov Str. 34/5, Moscow, 119991 Russia

2- Department of Transcription Factors,  
Engelhardt Institute of Molecular Biology, Russian Academy of Sciences,  
Vavilov Str. 32, Moscow, 119991 Russia

3- Laboratory of Tumor Cell Death,  
N.N. Blokhin Russian Cancer Research Center  
Kashirskoye Shosse 24, Moscow, 115478, Russia

4- Laboratory of Structure Bioinformatics,  
Institute of Biomedical Chemistry (IBMC),  
Pogodinskaya street 10 building 8, Moscow, 119121 Russia

\*- These authors contributed equally to the work

†- Correspondent authors: Dr. Soshnikova Nataliya, [so2615nat@gmail.com](mailto:so2615nat@gmail.com)

Dr. Georgieva Sofia, [sonjag@molbiol.edu.ru](mailto:sonjag@molbiol.edu.ru)

Figure S1. The level of mRNAs of FLAG-tagged PHF10 isoforms in transfected HEK293 cells

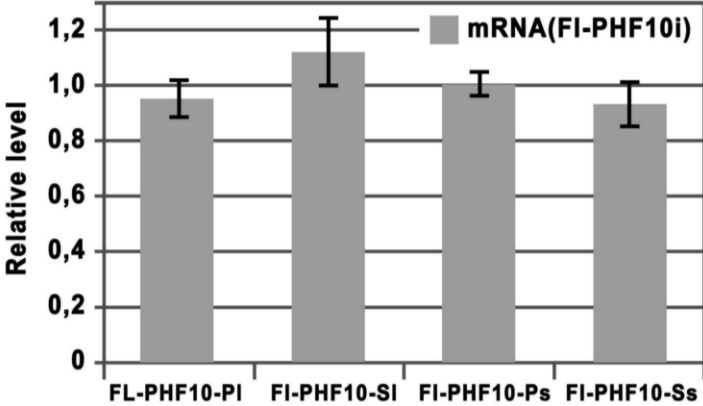

Figure S2. HEK293 cells were treated by CKI-7 inhibitor for 12, 24 and 48hrs. Equal amount of control and treated extracts were loaded in a PAAG gel and analyzed by Western-blot. It is clearly seen that PHF10 stability decreases upon treatment with CKI-7 inhibitor.

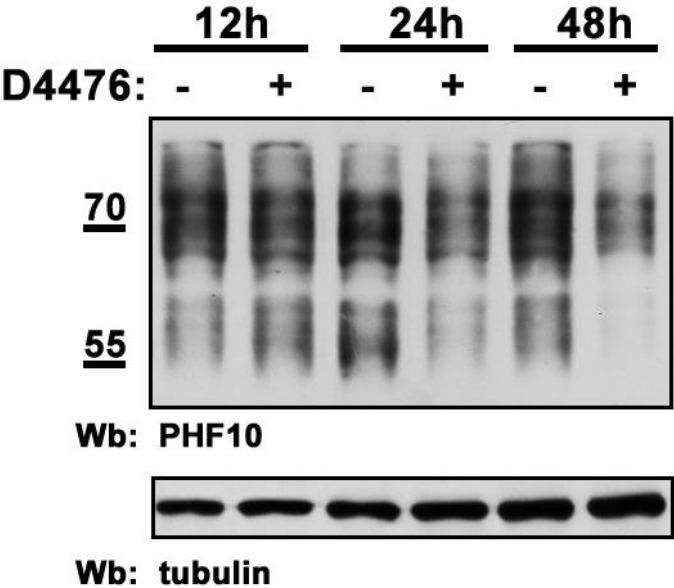

Figure S3. The full-length blot of Figure 3B

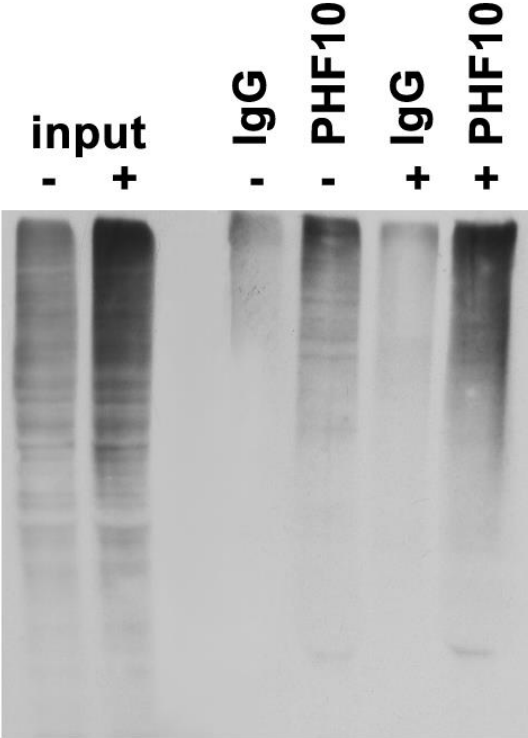

Figure S4. The full-length blot of Figure 5E

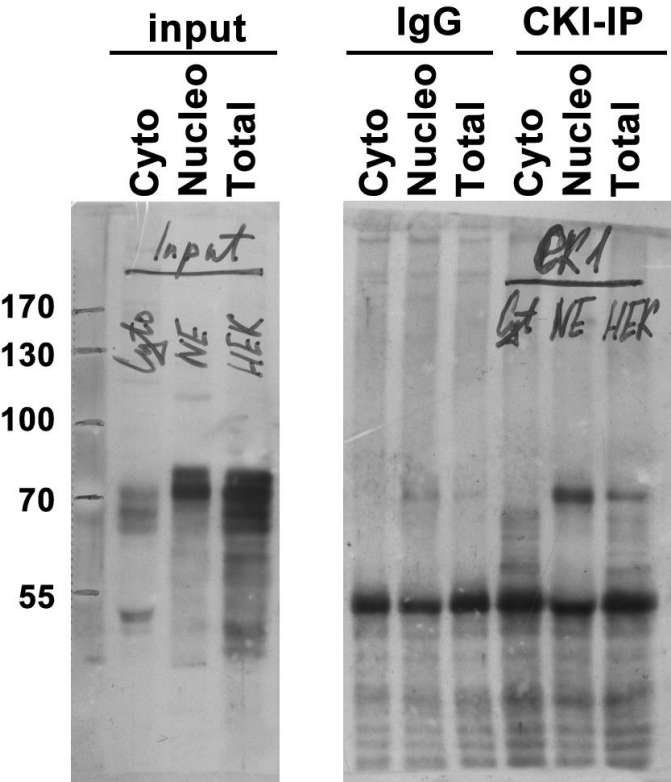

**Table S1. Degrones predicted by FIMO analysis, adapted from [11]**RMSD- Root mean square deviation from the reference  $\beta$ -Catenin peptide

Vina Score – Dock score function values

Sybyl  $\Delta G$  – Calculated binding energy values.

Extension – Possibility of further loop extension

N,C- position – N,C-terminus direction in comparison with the reference  $\beta$ -Catenin structure**Table S1**

| Ranking In FIMO (P-Value) | Motif Matched Human Sequence | Motif Start Position | Motif Stop Position | FIMO P-Value | Motif Position | Sequence Similarity Between Human Mouse | Sequence Similarity Between Human Fish | Sequence Similarity Between Human Fly |
|---------------------------|------------------------------|----------------------|---------------------|--------------|----------------|-----------------------------------------|----------------------------------------|---------------------------------------|
| 167                       | SDSSSGNVSE                   | 319                  | 328                 | 2,81E-06     | 328            | 1                                       | 0,8                                    | 0,2                                   |
| 2814                      | DDGEDGRGDE                   | 302                  | 311                 | 1,06E-04     | 311            | 0,9                                     | 0,5                                    | 0,1                                   |
| 8852                      | SCETSSQDLG                   | 56                   | 65                  | 4,27E-04     | 65             | 0                                       | 0,6                                    | 0                                     |
| 13529                     | QCENSGHPSC                   | 403                  | 412                 | 7,14E-04     | 412            | 0,9                                     | 0,9                                    | 0,5                                   |

**Table S2. Analysis of the best peptides conformations**

|                       | RMSD         | Vina        | SYBYL          | Extension | N,C-position |
|-----------------------|--------------|-------------|----------------|-----------|--------------|
| <b>Peptide1</b>       |              |             |                |           |              |
| <b>P, model2</b>      | <b>9,128</b> | <b>-5,8</b> | <b>-74,288</b> |           | <b>+</b>     |
| P, model3             | 5,874        | -5,7        | 22,656         | +         |              |
| A, model2             | 9,405        | -6,5        | -136,402       | +         |              |
| <b>A, model3</b>      | <b>3,965</b> | <b>-6,5</b> | <b>-251,53</b> | <b>+</b>  | <b>+</b>     |
| A, model4             | 11,738       | -6,5        | -185,76        | +-        |              |
| E, model3             | 8,658        | -5,5        | -32,764        | +         |              |
| E, model4             | 8,428        | -5,4        | -92,636        |           |              |
| E, model5             | 9,19         | -5,3        | 53,576         | +         |              |
| <b>E, model7</b>      | <b>8,428</b> | <b>-5,3</b> | <b>-92,636</b> | <b>+</b>  | <b>+</b>     |
| Normal, model3        | 9,053        | -6,4        | -229,03        | +         |              |
| <b>Normal, model6</b> | <b>5,171</b> | <b>-6,2</b> | <b>-169,13</b> | <b>+</b>  | <b>+</b>     |
| <b>Peptide2</b>       |              |             |                |           |              |
| A, model1             | 8,42         | -6,6        | -49,722        | +         |              |

|                       |              |             |                |          |          |
|-----------------------|--------------|-------------|----------------|----------|----------|
| <b>A, model2</b>      | <b>8,067</b> | <b>-6,4</b> | <b>-87,21</b>  | <b>+</b> | <b>+</b> |
| <b>E, model1</b>      | <b>5,986</b> | <b>-5,8</b> | <b>-39,414</b> | <b>+</b> | <b>+</b> |
| E, model2             | 6,602        | -5,7        | -27,972        | +        | +        |
| E, model3             | 6,981        | -5,7        | -25,036        | +        | +        |
| Normal, model1        | 10,639       | -6,3        | -68,832        | +        |          |
| Normal, model2        | 11,457       | -6,2        | -55,622        |          |          |
| <b>Normal, model7</b> | <b>3,52</b>  |             | <b>-38,58</b>  | <b>+</b> | <b>+</b> |
| <b>P1, model1</b>     | <b>7,219</b> | <b>-6,2</b> | <b>-119,72</b> | <b>+</b> | <b>+</b> |
| P1, model4            | 5,955        | -6,2        | -96,826        | +        | +        |
| P2, model2            | 9,849        | -5,7        | -60,814        |          |          |
| <b>P2, model4</b>     | <b>5,982</b> | <b>-5,4</b> | <b>-82,908</b> | <b>+</b> | <b>+</b> |
| P2, model5            | 9,678        | -5,4        | -110,79        |          |          |
